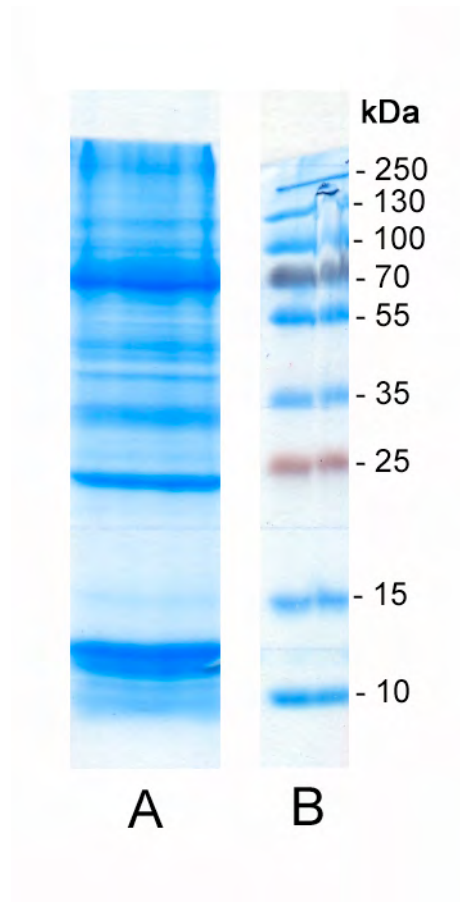

**Fig. S1.** (A) SDS-PAGE (15%) of the protein content of nuptial glands of a male *Rana temporaria* during the breeding season (Haacht, Belgium; 9 February 2010, sampled on the day of capture) and (B) PageRuler Plus Prestained Protein ladder (Fermentas) in kilodaltons (kDa). Proteins were extracted using acetylcholine chloride and 20  $\mu$ l of the extracted product was mixed with 5  $\mu$ l loading buffer and 1  $\mu$ l DDT for denaturation (5 min at room temperature, followed by 3 min at 90°C).
